# Supplementary material
Source: PubMed Central journal article supplement (PMC3813858)
Supplement: 0a35a071cf59fc1fbb91f3135d2f4545_genetics.113.156570-6.pdf [file 0a35a071cf59fc1fbb91f3135d2f4545_genetics.113.156570-6.pdf]

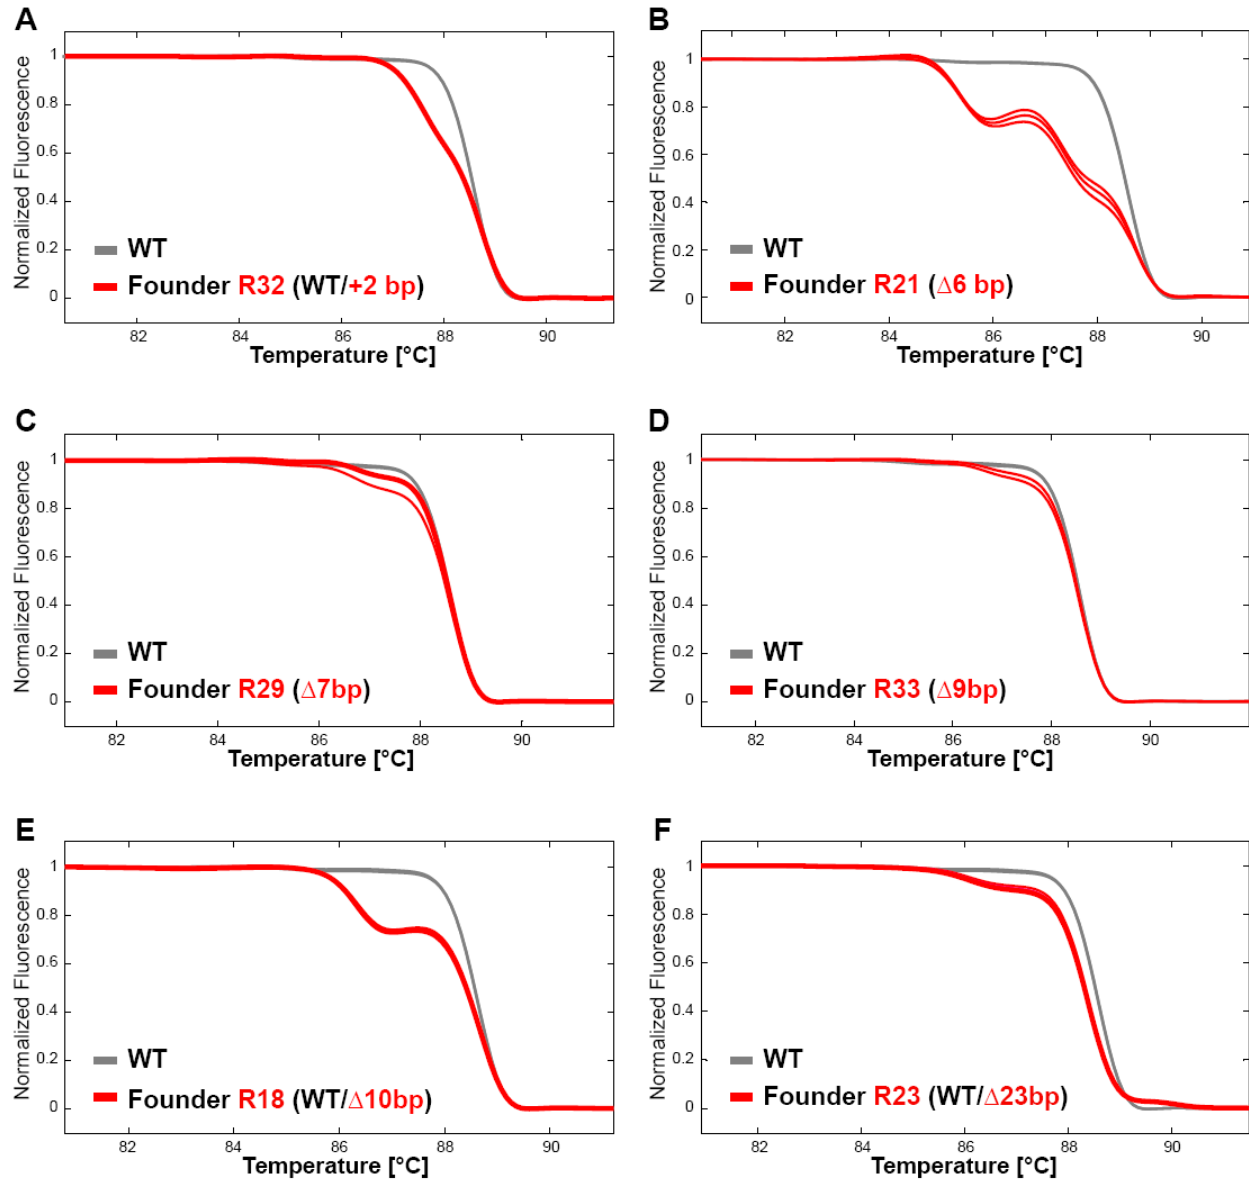

**Figure S2** HRMA for the identification of *C9orf72* founder mutants.

Melting analysis of PCR products amplified in triplicate from tail DNA of founder R32 (A), R21 (B), R29 (C), R33 (D), R18 (E), and R23 (F) (red curves, overlaid) or from a wildtype control mouse (grey curves, overlaid) demonstrated the presence of mutant allele(s). The genotype of mutant alleles is indicated in parentheses; see Figure 3 for the allele sequences.
