# Supplementary material
Source: PubMed Central journal article supplement (PMC3813858)
Supplement: 2c8ac63b61a9351781693c904c2ef0d1_genetics.113.156570-4.pdf [file 2c8ac63b61a9351781693c904c2ef0d1_genetics.113.156570-4.pdf]

**Table S2 Potential off-target sites of TALEN-Rik2 and TALEN-Fus15.**

| Locus                 | Chromosomal position            | Target sequence A<br>(5'-3') | Spacer<br>length | Target sequence B (5'-3')  | Dimer<br>type |
|-----------------------|---------------------------------|------------------------------|------------------|----------------------------|---------------|
| <i>C9orf72</i>        | <i>Chr4:35218811-35218854</i>   | T CTGTCTGGCAACAG             | 14               | T GTCGACTATCTGCC           | A-B           |
| <i>Csmd1</i>          | <i>Chr8:16813743-16813785</i>   | T <b>CTAACTTGACAACA</b>      | 13               | T <b>CTATCTAATTAAACA</b>   | A-A           |
| Intergenic            | <i>Chr8:34491313-34491356</i>   | T CTGTCT <b>CCACC</b> AG     | 14               | T <b>ATCAACTACATAACC</b>   | A-B           |
| <i>Gfra1</i>          | <i>Chr19:58314874-58314920</i>  | T CTGT <b>GTTCA</b> CAAAG    | 17               | T CTGT <b>CCTGACC</b> ACAG | A-A           |
| Intergenic            | <i>Chr9:112015226-112015268</i> | T CTGC <b>CTTGACA</b> ACCT   | 13               | T <b>TTCAACTATGT</b> GCCC  | A-B           |
| Intergenic            | <i>Chr19:4408724-4408766</i>    | T <b>CAGCCTTGGCA</b> ACAT    | 13               | T <b>CTCTTCCCAA</b> AAG    | A-A           |
| <i>Fus</i>            | <i>Chr7:127981783-127981827</i> | T CTTTCAGGGGCGAGC            | 15               | T AATATGGCCTCTCCC          | A-B           |
| Intergenic            | <i>Chr4:149785023-149785065</i> | T <b>CATTCAAGCCGA</b> AAGC   | 13               | T AATAT <b>GACAT</b> CTCCC | A-B           |
| <i>Zdhhc5</i>         | <i>Chr2:84705308-84705354</i>   | T <b>CTATCAAAGGCA</b> ACC    | 17               | T <b>AAGATGACCACTCCA</b>   | A-B           |
| <i>Sec23b</i>         | <i>Chr2:144575630-144575674</i> | T CTTT <b>ACAGAACTA</b> AC   | 15               | T <b>AAAATGACCTC</b> CCCC  | A-B           |
| <i>AC122296.2-201</i> | <i>Chr6:67120279-67120328</i>   | T CTT <b>CCACAACCA</b> AAGC  | 20               | T CTTT <b>CGGCCCA</b> AAGC | A-A           |
| Intergenic            | <i>ChrX:35868551-35868598</i>   | T CTT <b>ACAAAGCCA</b> AAC   | 18               | T <b>CATATAACTTCTCCA</b>   | A-B           |

TALEN-Rik2 and TALEN-Fus15 binding sequences are shown in bold letters. Nucleotides of off-target sites matching the target are shown in black, mismatches in off-target sites are shown in red. A-B: heterodimeric target sequence, A-A: homodimeric target sequence.
