# Supplementary material
Source: PubMed Central journal article supplement (PMC3813858)
Supplement: 27ded6f9b38df01a1383f4ef93c4a835_genetics.113.156570-9.pdf [file 27ded6f9b38df01a1383f4ef93c4a835_genetics.113.156570-9.pdf]

**A**

|        |                                                      |
|--------|------------------------------------------------------|
| WT     | GATCGACGTGGCAGAGGAGGATATGACCGGGGCGGCTACCGGGGCCGAGGAG |
| F29-24 | GATCGACGTGGCAGAGGAGGATATGACCGGGGCGGCTACCGGGGCCGAGGAG |
|        | Exon 14                                              |
| WT     | GGGACCGTGGGGGCTTCAGAGGGGGCCGGGGTGGTGGGGACAGAGGCGGTTT |
| F29-24 | GGGACCGTGGGGGCTTCAGAGGGGGCCGGGGTGGTGGGGACAGAGGCGGTTT |
|        | Exon 14                                              |
| WT     | TGGCCCTGGCAAGATGGACTCCAGGGGCGAGCACAGAC-AGGATCGCAGGGA |
| F29-24 | TGGCCCTGGCAAGATGGACTCCAGGGGCGAGCACAGAC-AGGATGCAGGGA  |
|        | Exon 14                      Exon 15                 |
|        | TALEN-Fus 15A*                      R513G            |
| WT     | GAGGCCATATTAGCCTGGCTCCTGAAGTTCTGGAACCTTTCCTGTACCCAGT |
| F29-24 | GAGGCCATATTAGCCTGGCTCCTGAAGTTCTGGAACCTTTCCTGTACCCAGT |
|        | Exon 15                      3' UTR                  |
|        | TALEN-Fus 15B                      Stop codon        |
| WT     | GTTACCCTTGTTATTTTGTAAACTTACAATTCAGGATCGCTCATGGATATTT |
| F29-24 | GTTACCCTTGTTATTTTGTAAACTTACAATTCAGGATCGCTCATGGATATTT |
|        | 3' UTR                                               |
| WT     | TTTTTTGGGGGGGTGGGGCGGTTGTGTGTGTATGTGTGTGTGTGTGTCA    |
| F29-24 | TTTTTTGGGGGGGTGGGGCGGTTGTGTGTGTATGTGTGTGTGTGTGTCA    |
|        | 3' UTR                                               |
| WT     | GACTACCCTAATTGTAACCA                                 |
| F29-24 | GACTACCCTAATTGTAACCA                                 |
|        | 3' UTR                                               |

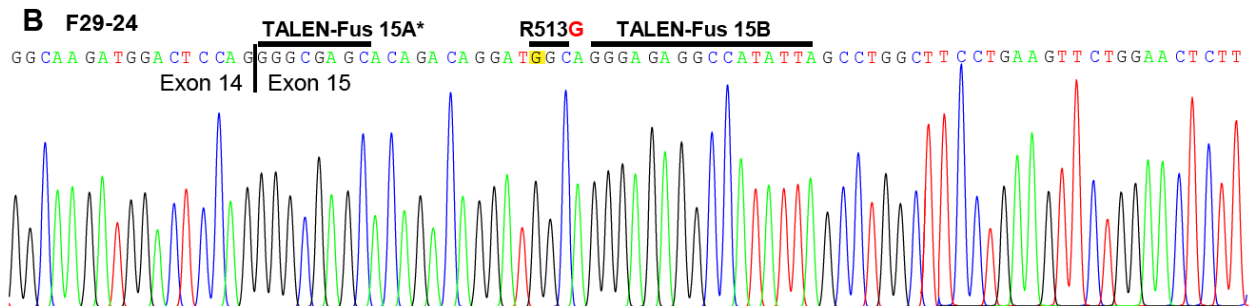

**Figure S4** Sequence analysis of *Fus*<sup>R513G</sup> cDNA.

**(A)** Sequence comparison of the cloned PCR product representing 341 bp of the *Fus* cDNA sequence, including exon 14, exon 15 and 3'UTR sequences, derived from the mutant pup F29-24 in comparison to wildtype cDNA sequence. **(B)** Chromatogram showing the sequencing peaks of the cloned PCR product covering the *Fus* codon 513 (nucleotide replacement highlighted in yellow). The positions of exon 14, exon 15, exon boundary, stop codon, 3' UTR, TALEN binding sites and of the R513G replacement are indicated.
