# Supplementary material
Source: PubMed Central journal article supplement (PMC3813858)
Supplement: 97ffdaf81b9c98054ad4347d0d2b716b_genetics.113.156570-3.pdf [file 97ffdaf81b9c98054ad4347d0d2b716b_genetics.113.156570-3.pdf]

**Table S3 Oligonucleotides used in this study**

| <b>Amplicon Name</b> | <b>Forward Primer (5'-3')</b> | <b>Reverse Primer (5'-3')</b> |
|----------------------|-------------------------------|-------------------------------|
| <i>Fus</i>           | CTATGGAGATGATCGACGTG          | TGGTTACAATTAGGGTAGTCTG        |
| <i>Fus</i> HRMA      | CATGGGTAGGGTAGTTCAGTAACACGT   | ACACTGGGTACAGGAAGAGTCCAG      |
| <i>Fus</i> OS1       | CCAACCACCCATGGCTTCTTATTA      | GCACTGGGGTAGCATAACACATC       |
| <i>Fus</i> OS2       | GCTTTCCTTGTTTTAGCACTCTGC      | CTGCAGCCACTCCCTAAACTTCTT      |
| <i>Fus</i> OS3       | CTCCCTCCCTCTGTCTGTCTCTG       | TTTCTGGGTTACCTGGGGTCAAGTA     |
| <i>Fus</i> OS4       | CCCAAGCAGCTGGACTAAGGATCT      | ACACCTGGTGGTAGTTCATTGCTT      |
| <i>Fus</i> OS5       | GTGAGTTCAAGTCCAGCCCAGTCT      | GCTTTGTGGCAGGCACTTTTATTC      |
| <i>Fus</i> R513G     | TGGGTAGGGTAGTTCAGTAAC         | ACAAGGGTAACACTGGGTAC          |
| <i>Fus</i> 5' US     | GTCATCAAGCACCTTTACCTG         | TGGTTACAATTAGGGTAGTCTG        |
| <i>Fus</i> 3' DS     | TGGGTAGGGTAGTTCAGTAAC         | ACTCTTGTCTAGCAGTGATTCTC       |
| <i>Rik</i>           | TTAGCTGAAATGGTTTGGAGAC        | CATCACTGAGAAGCACTTGG          |
| <i>Rik</i> HRMA      | CGTTCGGATAATGTGAGACCTG        | CAAAGGTAGCCGCCAACAAG          |
| <i>Rik</i> OS1       | TGACTGACAGGCTTCACAGAGAGC      | CTACTGGGGACTGATGACTACCTG      |
| <i>Rik</i> OS2       | CACAGGGACTTTGTGTGCACTCTT      | AAACCAGAGCATGGCTTTGAAAAA      |
| <i>Rik</i> OS3       | GAAGATAAACAGGAGCCGCATGAA      | TGACTACTAAGGGCCATTCTTC        |
| <i>Rik</i> OS4       | TACAGGCTTCACTCTGTGGGGTTT      | CCAGATCTGACTCAGGTAATGTGA      |
| <i>Rik</i> OS5       | AGTGGCCCCACACAGAAGAGTAAG      | AGGAATGTGTGGGCAAATCTTGTT      |
| <b>Sequencing</b>    |                               |                               |
| <b>Primer</b>        |                               |                               |
| <i>Fus</i> 5' RI 3   | —                             | GCACACCCTTCAAGTCTCTG          |
| <i>Fus</i> 5' RI 2   | GCGGGAGTGGGTGGGTTTTTG         | —                             |
| <i>Fus</i> 3' RI 5   | GACAATTTCCCGAATGGGC           | —                             |
