# Supplementary material
Source: PubMed Central journal article supplement (PMC3813858)
Supplement: 315a348ea1f805b898640cbbbf0f8dc6_genetics.113.156570-2.pdf [file 315a348ea1f805b898640cbbbf0f8dc6_genetics.113.156570-2.pdf]

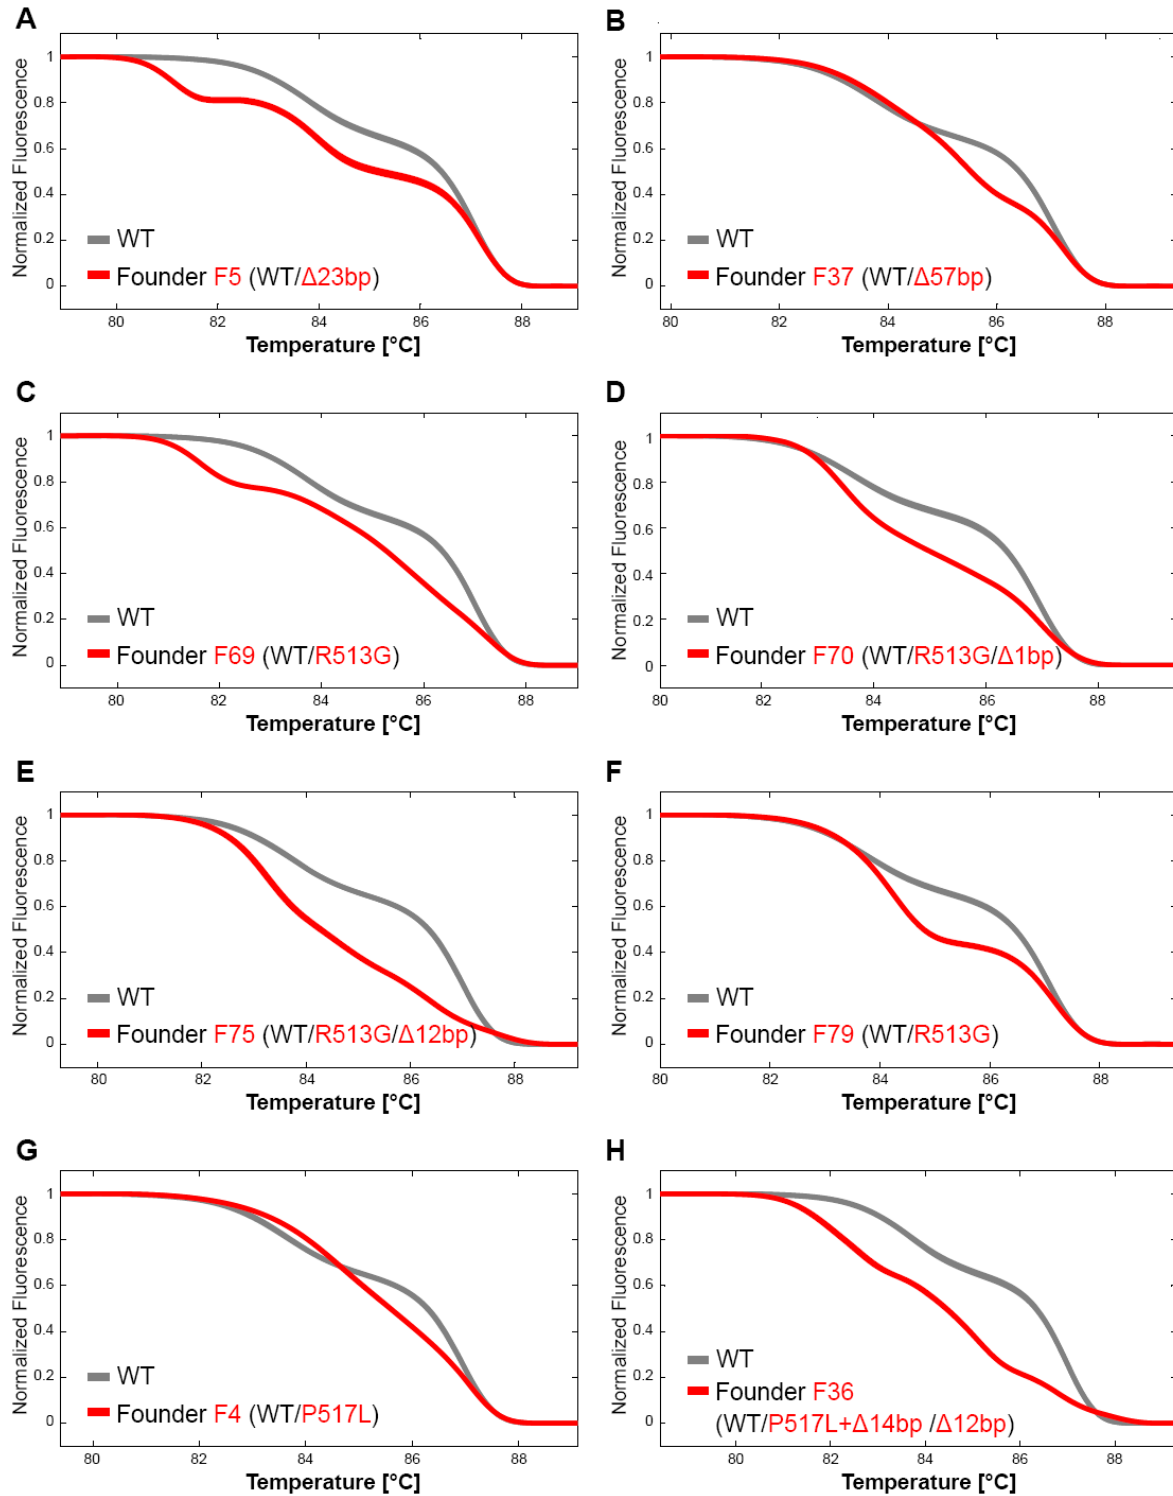

**Figure S3** HRMA for the identification of *Fus* founder mutants.

Melting analysis analysis of PCR products amplified in triplicate from tail DNA of founder F5 (A), F37 (B), F69 (C), F70 (D), F75 (E), and F79 (F) using TALEN-Fus15 and ODN<sup>R513G</sup> and of founder F4 (G), and F36 (H) using TALEN-Fus15 and ODN<sup>P517L</sup> (red curves, overlaid), or from a wildtype control mouse (grey curves, overlaid). The genotype of mutant alleles is indicated in parentheses; see Figure 4 for the allele sequences.
