# Supplementary material
Source: PubMed Central journal article supplement (PMC3813858)
Supplement: 697e0a5b2b15fb19c98bb23a4060df12_genetics.113.156570-7.pdf [file 697e0a5b2b15fb19c98bb23a4060df12_genetics.113.156570-7.pdf]

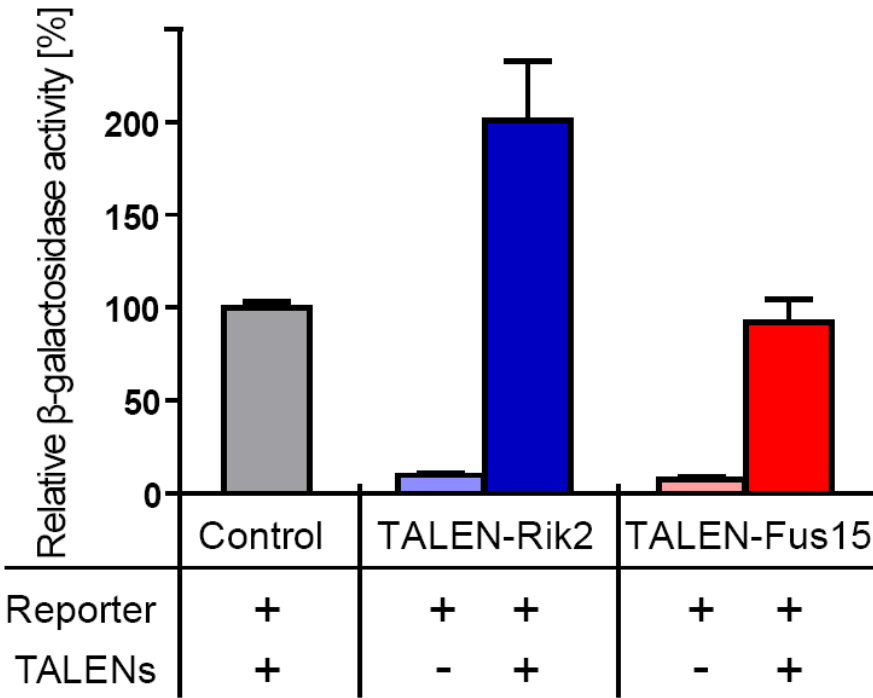

**Figure S1** TALEN activity in HEK 293 cells.

Cotransfection of reporter plasmids with TALEN-Rik2 or TALEN-Fus-15 vectors into HEK293 cells leads to nuclease dependent gene repair and  $\beta$ -galactosidase expression, as compared to the transfection of the reporter alone. Values are expressed as nuclease stimulated increase of  $\beta$ -galactosidase activity as compared to background levels without nuclease vectors (-) and to a TALEN/reporter standard (Control). The error bars represents s.d. in three replicates.
