# Supplementary material
Source: PubMed Central journal article supplement (PMC3813858)
Supplement: 2272ac7ef68ccdea028d2580a883ac44_genetics.113.156570-10.pdf [file 2272ac7ef68ccdea028d2580a883ac44_genetics.113.156570-10.pdf]

## File S1

### Supplementary methods

#### TALEN construction and expression

For the expression of TALENs in mammalian cells we used the expression vector pCAG-TALEN, that contains a CAG hybrid promoter region and a transcriptional unit comprising a sequence coding for the N-terminal amino acids 1 - 176 of TAL nuclease, located upstream of a pair of *BsmBI* restriction sites, as described (17). This N-terminal regions includes an ATG start codon, a nuclear localisation sequence, a FLAG Tag sequence, a glycine rich linker sequence, a segment coding for 110 amino acids of the TAL protein AvrBs3 and the invariable N-terminal TAL repeat of the Hax3 TAL effector. Downstream of the central *BsmBI* sites, the transcriptional unit contains 78 codons including an invariable C-terminal TAL repeat and 44 residues derived from the TAL protein AvrBs3, followed by the coding sequence of the FokI nuclease domain and a polyadenylation signal sequence. DNA segments coding for arrays of TAL repeats can be inserted into the *BsmBI* sites of pCAG-TALEN in frame with the up- and downstream coding regions to enable the expression of predesigned TAL-FokI nuclease proteins. To derive TAL element DNA-binding domains we used the TAL effector motif (repeat) #11 of the *Xanthomonas* Hax3 protein (LTPEQVVAIASNIGGKQALETVQRLLPVLCQAHG) to recognize A, the TAL effector motif #5 (LTPQQVVAIASHDGGKQALETVQRLLPVLCQAHG) derived from the Hax3 protein to recognize C, and the TAL effector motif #4 (LTPQQVVAIASNNGGKQALETVQRLLPVLCQAHG) from the *Xanthomonas* Hax4 protein to recognize T. To recognize a target G nucleotide we used the TAL effector motif #4 from the Hax4 protein with replacement of the amino acids 12 into N and 13 into N (LTPQQVVAIASNNGGKQALETVQRLLPVLCQAHG). These elements were obtained by gene synthesis (Genscript, Piscataway, NJ, USA) and further amplified by PCR using primers that include *BsaI* sites outside of the coding region. For a 15 bp TALEN target sequence seven elements each are pooled in a pair of reactions together with *BsaI* and T4 DNA ligase to create and ligate unique overhangs. Full length ligation products were recovered by gel extraction and inserted by seamless cloning (Gibson assembly, New England Biolabs) into pCAG-TALEN opened with *BsmBI*. The integrity of all TALEN expression vectors was confirmed by DNA sequencing. The complete sequence of the vector encoded TALEN proteins is shown below [blue letters, nuclear localization sequence; red letters, FLAG tag; green letters, AvrBs3 N- and C-terminal sequences; black letters, TAL repeats (RVDs are underlined); orange letters, FokI nuclease domain; gray letters, linker sequences]:

#### TALEN-Fus15A

MGPKKRRKVAAA**DKDDDDK**PGGGGSGGGGVPASPAAQVDLRTLGYSSQQQEKIKPKVRSVAQHHEALVGHGFTHAHIVALSQHPAALGTVA  
VKYQDMIAALPEATHEAIVGVGKQWSGARALEALLTVAGELRGPPLQSLDTGQLLKIARGGVTAVEAVHAWRNALTGAPLNLTTPQQVVAIASH

DGGKQALETVQRLLPVLCQAHGLTPQQVVAIASNGGGKQALETVQRLLPVLCQAHGLTPQQVVAIASNGGGKQALETVQRLLPVLCQAHGLTPQ  
QVVAIASNGGGKQALETVQRLLPVLCQAHGLTPQQVVAIASHGGKQALETVQRLLPVLCQAHGLTPEQVVAIASNGGKQALETVQRLLPVLCQA  
HGLTPQQVVAIASNGGKQALETVQRLLPVLCQAHGLTPQQVVAIASNGGKQALETVQRLLPVLCQAHGLTPQQVVAIASNGGKQALETVQR  
LLPVLCQAHGLTPQQVVAIASNGGKQALETVQRLLPVLCQAHGLTPQQVVAIASHGGKQALETVQRLLPVLCQAHGLTPQQVVAIASNGGKQ  
ALETVQRLLPVLCQAHGLTPEQVVAIASNGGKQALETVQRLLPVLCQAHGLTPQQVVAIASNGGKQALETVQRLLPVLCQAHGLTPQQVVAIAS  
HDGGRPALESIVAQLSRPDPALARSALTNDHLVALACLGGRPALDAVKKGLPHAPALIKRTNRRIPESDRLNQLVKSELEEKSELRHKLKYPHEYIE  
LIEIARNSTQDRILEMKVMEFFMKVYGYRGKHLGGSRKPDAIYTVGSPIDYGVIVDTKAYSGGYNLPIGQADEMQRYVEENQTRNKHINPNEWW  
KVYPSSVTEFKFLVSGHFKGNKYAQLTRLNHITNCNGAVLSVEELLIGGEMIKAGTLTLEEVRKFNNGEINF

**TALEN-Fus15B**

MGPKKKRKVAAADYKDDDDKPGGGGSGGGGVPASPAAQVDLRTLGYSSQQQEKIKPKVRSTVAQHHEALVGHGFTAHIVALSQHPAALGTVA  
VKYQDMIAALPEATHEAIVGVGKQWSGARALEALLTVAGELRGPPLQSGLDTGQLLKIARKGGVTAVEAVHAWRNALTGAPLNLTPEQVVAIASN  
GGKQALETVQRLLPVLCQAHGLTPEQVVAIASNGGKQALETVQRLLPVLCQAHGLTPQQVVAIASNGGGKQALETVQRLLPVLCQAHGLTPEQV  
AIASNGGKQALETVQRLLPVLCQAHGLTPQQVVAIASNGGGKQALETVQRLLPVLCQAHGLTPQQVVAIASNGGKQALETVQRLLPVLCQAHGL  
TPQQVVAIASNGGKQALETVQRLLPVLCQAHGLTPQQVVAIASHGGKQALETVQRLLPVLCQAHGLTPQQVVAIASHGGKQALETVQRLLPV  
LCQAHGLTPQQVVAIASNGGKQALETVQRLLPVLCQAHGLTPQQVVAIASHGGKQALETVQRLLPVLCQAHGLTPQQVVAIASNGGGKQALET  
VQRLLPVLCQAHGLTPQQVVAIASHGGKQALETVQRLLPVLCQAHGLTPQQVVAIASHGGKQALETVQRLLPVLCQAHGLTPQQVVAIASHDG  
GRPALESIVAQLSRPDPALARSALTNDHLVALACLGGRPALDAVKKGLPHAPALIKRTNRRIPESDRLNQLVKSELEEKSELRHKLKYPHEYIELIEIA  
RNSTQDRILEMKVMEFFMKVYGYRGKHLGGSRKPDAIYTVGSPIDYGVIVDTKAYSGGYNLPIGQADEMQRYVEENQTRNKHINPNEWWKVYP  
SSVTEFKFLVSGHFKGNKYAQLTRLNHITNCNGAVLSVEELLIGGEMIKAGTLTLEEVRKFNNGEINF

**TALEN-Rik2A**

MGPKKKRKVAAADYKDDDDKPGGGGSGGGGVPASPAAQVDLRTLGYSSQQQEKIKPKVRSTVAQHHEALVGHGFTAHIVALSQHPAALGTVA  
VKYQDMIAALPEATHEAIVGVGKQWSGARALEALLTVAGELRGPPLQSGLDTGQLLKIARKGGVTAVEAVHAWRNALTGAPLNLTPEQVVAIASN  
NGGKQALETVQRLLPVLCQAHGLTPQQVVAIASNGGGKQALETVQRLLPVLCQAHGLTPQQVVAIASHGGKQALETVQRLLPVLCQAHGLTPQ  
QVVAIASNGGKQALETVQRLLPVLCQAHGLTPEQVVAIASNGGKQALETVQRLLPVLCQAHGLTPQQVVAIASHGGKQALETVQRLLPVLCQA  
HGLTPQQVVAIASNGGGKQALETVQRLLPVLCQAHGLTPEQVVAIASNGGKQALETVQRLLPVLCQAHGLTPQQVVAIASNGGKQALETVQRLL  
PVLCQAHGLTPQQVVAIASHGGKQALETVQRLLPVLCQAHGLTPQQVVAIASNGGGKQALETVQRLLPVLCQAHGLTPQQVVAIASNGGKQ  
LETVQRLLPVLCQAHGLTPQQVVAIASHGGKQALETVQRLLPVLCQAHGLTPQQVVAIASHGGKQALETVQRLLPVLCQAHGLTPQQVVAIASH  
DGGRPALLESIVAQLSRPDPALARSALTNDHLVALACLGGRPALDAVKKGLPHAPALIKRTNRRIPESDRLNQLVKSELEEKSELRHKLKYPHEYIELI

EIARNSTQDRILEMKVMEFFMKVYGYRGKHLGGSRKPDGAIYTVGSPIDYGVIVDTKAYSGGYNLPIGQADEMQRYVEENQTRNKHINPNEWWKV  
 YPSSVTEFKFLFVSGHFKGNYKAQLTRLNHITNCNGAVLSVEELLIGGEMIKAGTLTLEEVRRKFNNGEINF

**TALEN-Rik2B**

MGPKKKRKVAAA**DYKDDDDK**PGGGGSGGGGVPASPAAQVDLRTLGYSSQQQEKIKPKVRSTVAQHHEALVGHGFTHAHIVALSQHPAALGTVA  
 VKYQDMIAALPEATHEAIVGVGKQWSGARALEALLTVAGELRGPPLQSGLDTGQLLKIARGGVTAVEAVHAWRNALTGAPLNLTPOQVVAIASH  
 DGGKQALETVQRLLPVLCQAHGLTPQQVVAIASNNGGKQALETVQRLLPVLCQAHGLTPQQVVAIASNNGGKQALETVQRLLPVLCQAHGLTPQ  
 QVVAIASNNGGKQALETVQRLLPVLCQAHGLTPQQVVAIASHDGGKQALETVQRLLPVLCQAHGLTPQQVVAIASNNGGKQALETVQRLLPVLCQ  
 AHGLTPQQVVAIASNNGGKQALETVQRLLPVLCQAHGLTPQQVVAIASNNGGKQALETVQRLLPVLCQAHGLTPQQVVAIASNNGGKQALETVQ  
 RLLPVLCQAHGLTPQQVVAIASHDGGKQALETVQRLLPVLCQAHGLTPEQVVAIASNIGGKQALETVQRLLPVLCQAHGLTPEQVVAIASNIGGKQA  
 LETVQRLLPVLCQAHGLTPQQVVAIASHDGGKQALETVQRLLPVLCQAHGLTPEQVVAIASNIGGKQALETVQRLLPVLCQAHGLTPQQVVAIASNK  
 GGRPALESIVAQLSRPDPALARSALTNDHLVALACLGGRPALDAVKKGLPHAPALIKRTNRRRIPEGSDRLNQLVKSELEEKSELRHKLKYPHEYIELIE  
 IARNSTQDRILEMKVMEFFMKVYGYRGKHLGGSRKPDGAIYTVGSPIDYGVIVDTKAYSGGYNLPIGQADEMQRYVEENQTRNKHINPNEWWKVY  
 PSSVTEFKFLFVSGHFKGNYKAQLTRLNHITNCNGAVLSVEELLIGGEMIKAGTLTLEEVRRKFNNGEINF

**TALEN RVD arrays:**

| TALEN                                   | RVD sequence (w/o last half repeat)                                                                                      |
|-----------------------------------------|--------------------------------------------------------------------------------------------------------------------------|
| TALEN-Fus15A<br>Target sequence (5'-3') | <p>HD NG NG NG HD NI NN NN NN NN HD NN NI NN</p> <p>↓ ↓ ↓ ↓ ↓ ↓ ↓ ↓ ↓ ↓ ↓ ↓ ↓ ↓ ↓</p> <p>C T T T C A G G G G C G A G</p> |
| TALEN-Fus15B<br>Target sequence (5'-3') | <p>NI NI NG NI NG NN NN HD HD NG HD NG HD HD</p> <p>↓ ↓ ↓ ↓ ↓ ↓ ↓ ↓ ↓ ↓ ↓ ↓ ↓ ↓ ↓</p> <p>A A T A T G G C C T C T C C</p> |
| TALEN-Rik2A<br>Target sequence (5'-3')  | <p>NN NG HD NN NI HD NG NI NG HD NG NN HD HD</p> <p>↓ ↓ ↓ ↓ ↓ ↓ ↓ ↓ ↓ ↓ ↓ ↓ ↓ ↓ ↓</p> <p>G T C G A C T A T C T G C C</p> |
| TALEN-Rik2B<br>Target sequence (5'-3')  | <p>HD NG NN NG HD NG NG NN NN HD NI NI HD NI</p> <p>↓ ↓ ↓ ↓ ↓ ↓ ↓ ↓ ↓ ↓ ↓ ↓ ↓ ↓ ↓</p> <p>C T G T C T T G G C A A C A</p> |

### Construction of reporter plasmids

Nuclease reporter plasmids were generated by the insertion of annealed sense and anti-sense oligonucleotides (Metabion, Martinsried, Germany), harboring the TALEN target sequences, (underlined) into the generic reporter plasmid pTAL-Rep, as described (17).

*Fus* target sense oligonucleotide:

5'-cggccaccatggtcgtctttcagggcgagcacagacaggatcgagggagaggccatattatg-3'

*Fus* target anti-sense oligonucleotide:

5'-cataaatatggcctctcctgcgatcctgtctgtgctcgcccctgaaagacgaccatggtggc-3'

*C9orf72* target sense oligonucleotide:

5'-cgtgtcgactatctgccccccaccatctctgctgttgccaagacaga-3'

*C9orf72* target anti-sense oligonucleotide:

5'-tctgtcttgcaacagcaggagatggtgggggagatagtcgaca-3'

The integrity of all reporter plasmids was confirmed by DNA sequencing.

For the assessment of TALEN nuclease activities, expression vectors were cotransfected with the corresponding reporter plasmid into HEK 293 cells. Two days after transfection the cells were lysed and  $\beta$ -galactosidase was determined by chemiluminescence, as described (17).

### RNA isolation and cDNA synthesis

Total RNA was isolated from tail tips using Trizol<sup>®</sup> (Life Technologies, Carlsbad, USA). Total RNA was reverse transcribed into cDNA using the Protoscript M-MuLV Taq-RT PCR kit (New England Biolabs) in presence of oligo dT<sub>23</sub>VN, according to the manufacturer's protocol. Synthesized cDNA was diluted four times for further experiments.

### PCR amplification, cloning and sequencing

Amplification of the diluted cDNA was performed by using Herculase II polymerase in 50  $\mu$ l reactions with 30 cycles of {95 °C, 20 s; 51.5 °, 20 s; 72 °C, 30 s} using *Fus* specific primers (Table S3) to amplify 341 nucleotides spanning exon 14, exon 15 (which

encodes the NLS) and the 3'-UTR of the *Fus*, mRNA sequence. The resulting amplified product was subcloned using the StrataClone Blunt PCR Cloning Kit (Agilent, Waldbronn, Germany) and sequenced.

A hot start PCR protocol was employed for the amplification of genomic *Fus* gene fragments covering sequences 3.5kb upstream and 3.3 kb downstream of codon 513. PCR was carried out using Herculase II polymerase in 50 µl reactions with the 30 cycles of {95 °C, 20 s; 63 °, 20 s; 72 °C, 2 mins} using the gene specific primers (See Table S3: *Fus* 5' US and *Fus* 3' DS). PCR products were isolated by gel extraction (Qiagen, Hilden, Germany) and directly sequenced.
