# Supplementary material
Source: PubMed Central journal article supplement (PMC3813858)
Supplement: 33998b7c2a3ac794db74ec0cbebecca0_genetics.113.156570-8.pdf [file 33998b7c2a3ac794db74ec0cbebecca0_genetics.113.156570-8.pdf]

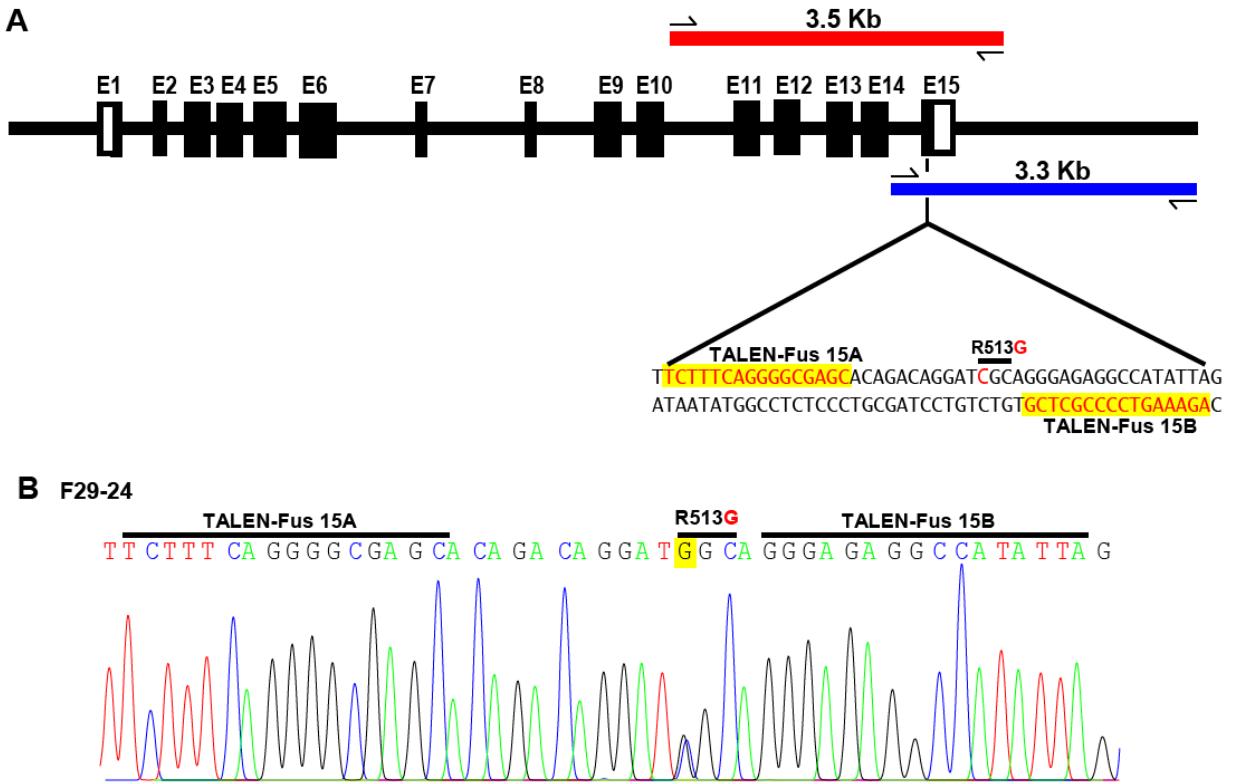

**Figure S5** Sequence analysis of the *Fus*<sup>R513G</sup> locus.

**(A)** Schematic drawing of the mouse *Fus* gene, showing the PCR amplified segments of 3.5 kb and 3.3 kb PCR product, which both overlap codon 513. Amplification was performed using tail DNA of the heterozygous (*Fus*<sup>R513G</sup>) pup F29-24 such that equal amounts of PCR products are derived from the *Fus* wildtype and the *Fus*<sup>R513G</sup> alleles are expected. **(B)** Chromatogram covering the sequence around codon 513, showing a mixed peak at the position of the targeted *Fus*<sup>R513G</sup> nucleotide replacement.
