# Supplementary material
Source: PubMed Central journal article supplement (PMC3813858)
Supplement: f554fcae2bf04eeb0a8a059b707145b7_genetics.113.156570-11.pdf [file f554fcae2bf04eeb0a8a059b707145b7_genetics.113.156570-11.pdf]

**Table S1 Germline transmission of TALEN-induced mutations**

| <b>Microinjection experiment</b>   | <b>Founder</b> | <b>Pups</b> | <b>Mutant pups</b> |
|------------------------------------|----------------|-------------|--------------------|
| TALEN-Rik2                         | R23            | 15          | 7                  |
|                                    | F5             | 10          | 1                  |
| TALEN-Fus15 + ODN <sup>R513G</sup> | F18            | 23          | 13                 |
|                                    | F29            | 15          | 8                  |
|                                    | F37            | 17          | 8                  |
|                                    | F70            | 3           | 2                  |
|                                    | F75            | 7           | 4                  |
| TALEN-Fus15 + ODN <sup>P517L</sup> | F36            | 12          | 8                  |
